# Supplementary material for: Alternative Mechanisms for Fast Na+/Ca2+ Signaling in Eukaryotes via a Novel Class of Single-Domain Voltage-Gated Channels
Source: PubMed Central journal article supplement — Curr Biol. 2019 May 6;29(9):1503–1511.e6. doi: 10.1016/j.cub.2019.03.041 (PMC6509283; doi:10.1016/j.cub.2019.03.041), 2019-05-06
Supplement: mmc1.pdf [file mmc1.pdf]

**Current Biology, Volume 29**

**Supplemental Information**

**Alternative Mechanisms for Fast Na<sup>+</sup>/Ca<sup>2+</sup>  
Signaling in Eukaryotes via a Novel Class  
of Single-Domain Voltage-Gated Channels**

**Katherine E. Helliwell, Abdul Chrachri, Julie A. Koester, Susan Wharam, Frédéric Verret, Alison R. Taylor, Glen L. Wheeler, and Colin Brownlee**

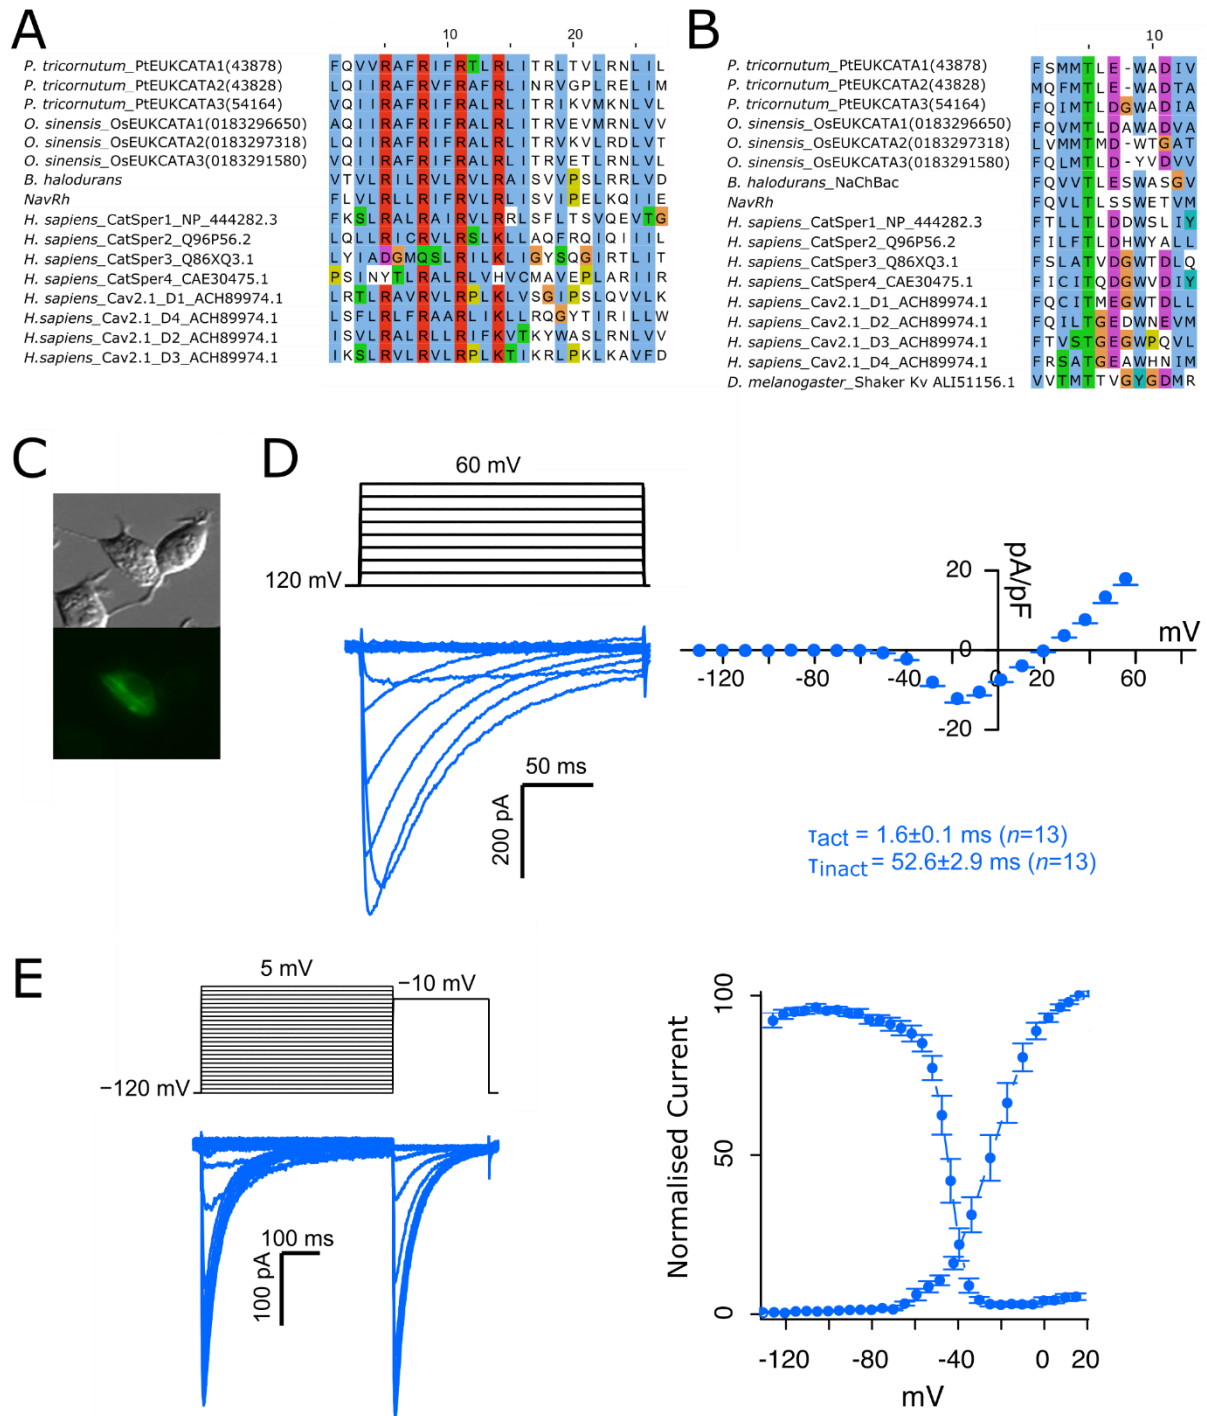

**Figure S1. Diatom EukCatAs exhibit a predicted voltage-sensing domain and selectivity filter, and OsEUKCATA1 expressed in HEK293 cells exhibits rapid activation and inactivation kinetics resembling those of *O. sinensis* action potentials (related to Figure 1 & 2; Table S1 and S2; Data S1). A. Alignment of the voltage-sensing domain of diatom EukCatAs (including OsEUKCATA1 and PtEUKCATA1) compared to other voltage-gated channels. The presence of multiple positively charged Arg residues are indicated. The region shown corresponds to amino acids 109-135 of *Bacillus halodurans* C-125 NaChBac**

(BAB05220.1 BH1501). The CatSpers are relatively weakly voltage-gated, with subunits three and four possessing fewer Arg residues in this region. **B.** Alignment of the selectivity filter of EukCats (corresponding to amino acids 185 to 197 of NaChBac) to voltage-gated  $\text{Ca}^{2+}$ ,  $\text{Na}^{+}$  and  $\text{K}^{+}$  channels. **C.** DIC and GFP fluorescence image confirming expression of PtEUKCATA1-GFP fusion in a transfected HEK293 cell. **D.** Representative currents (I) for OsEUKCATA1 with averaged current-voltage (IV) curves (right), where I was normalized to cell capacitance ( $n=24$ ). **E.** Representative traces for steady state inactivation (left) and normalized currents (right), where activation is represented by tail current analysis. Boltzmann fitted functions yielded  $V_{0.5}$  of inactivation of  $-45.11 \pm 0.2$  mV ( $n=12$ ) and the  $V_{0.5}$  of activation of  $-23.8 \pm 0.2$  mV ( $n=12$ ). OsEUKCATA1 exhibited rapid kinetics:  $\tau_{\text{activation}}$  and  $\tau_{\text{inactivation}}$  time constants (measured at  $-10$  mV) were  $1.6 \pm 0.1$  ms (OsEUKCATA1), and  $52.6 \pm 2.9$  ms (OsEUKCATA1), respectively (**Table S1**). These are comparable to 4D- $\text{Ca}_v/\text{Na}_v$ s and closely resemble those of the *O. sinensis* action potentials (**Figure 1A**) [S1].

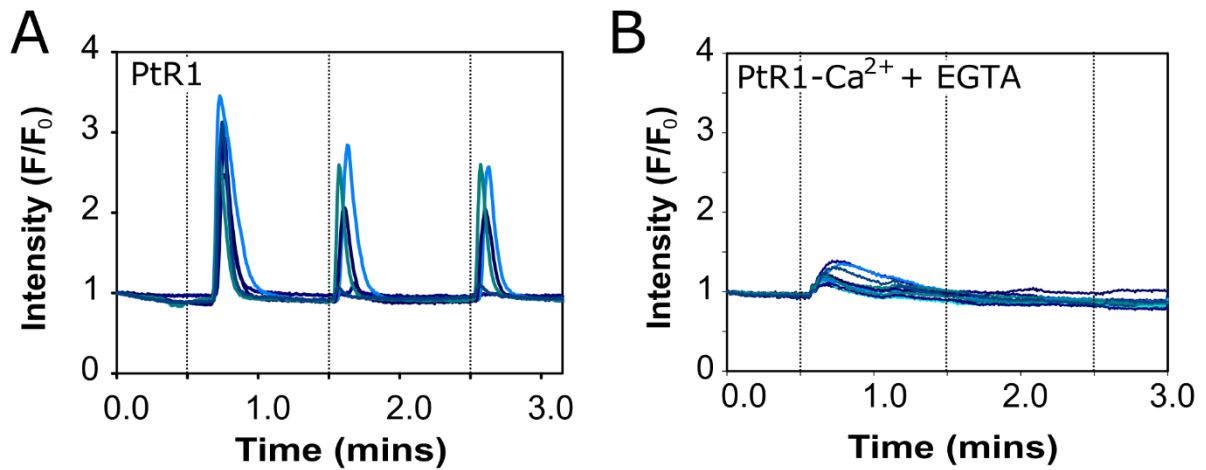

**Figure S2. Transgenic *P. tricornutum* stably expressing the intensimetric fluorescent Ca<sup>2+</sup> indicator R-GECO (line PtR1) exhibits robust [Ca<sup>2+</sup>]<sub>cyt</sub> elevations in response to hypo-osmotic shock (related to Figure 3). A.** Representative traces of Ca<sup>2+</sup> responses (F/F<sub>0</sub>) over time for PtR1 cells exposed to three sequential 30 s hypo-osmotic shocks with 90% ASW diluted 10% with deionised water. Hypo-osmotic shocks were elicited at 30, 90 and 150 s (dashed lines) and between each shock cells were returned to standard ASW medium before the next treatment. **B.** as in (A) but in ASW diluted 50% with deionised water –Ca<sup>2+</sup> +200 μM EGTA. Representative traces are shown from a total of 5 cells and 11 cells, respectively.

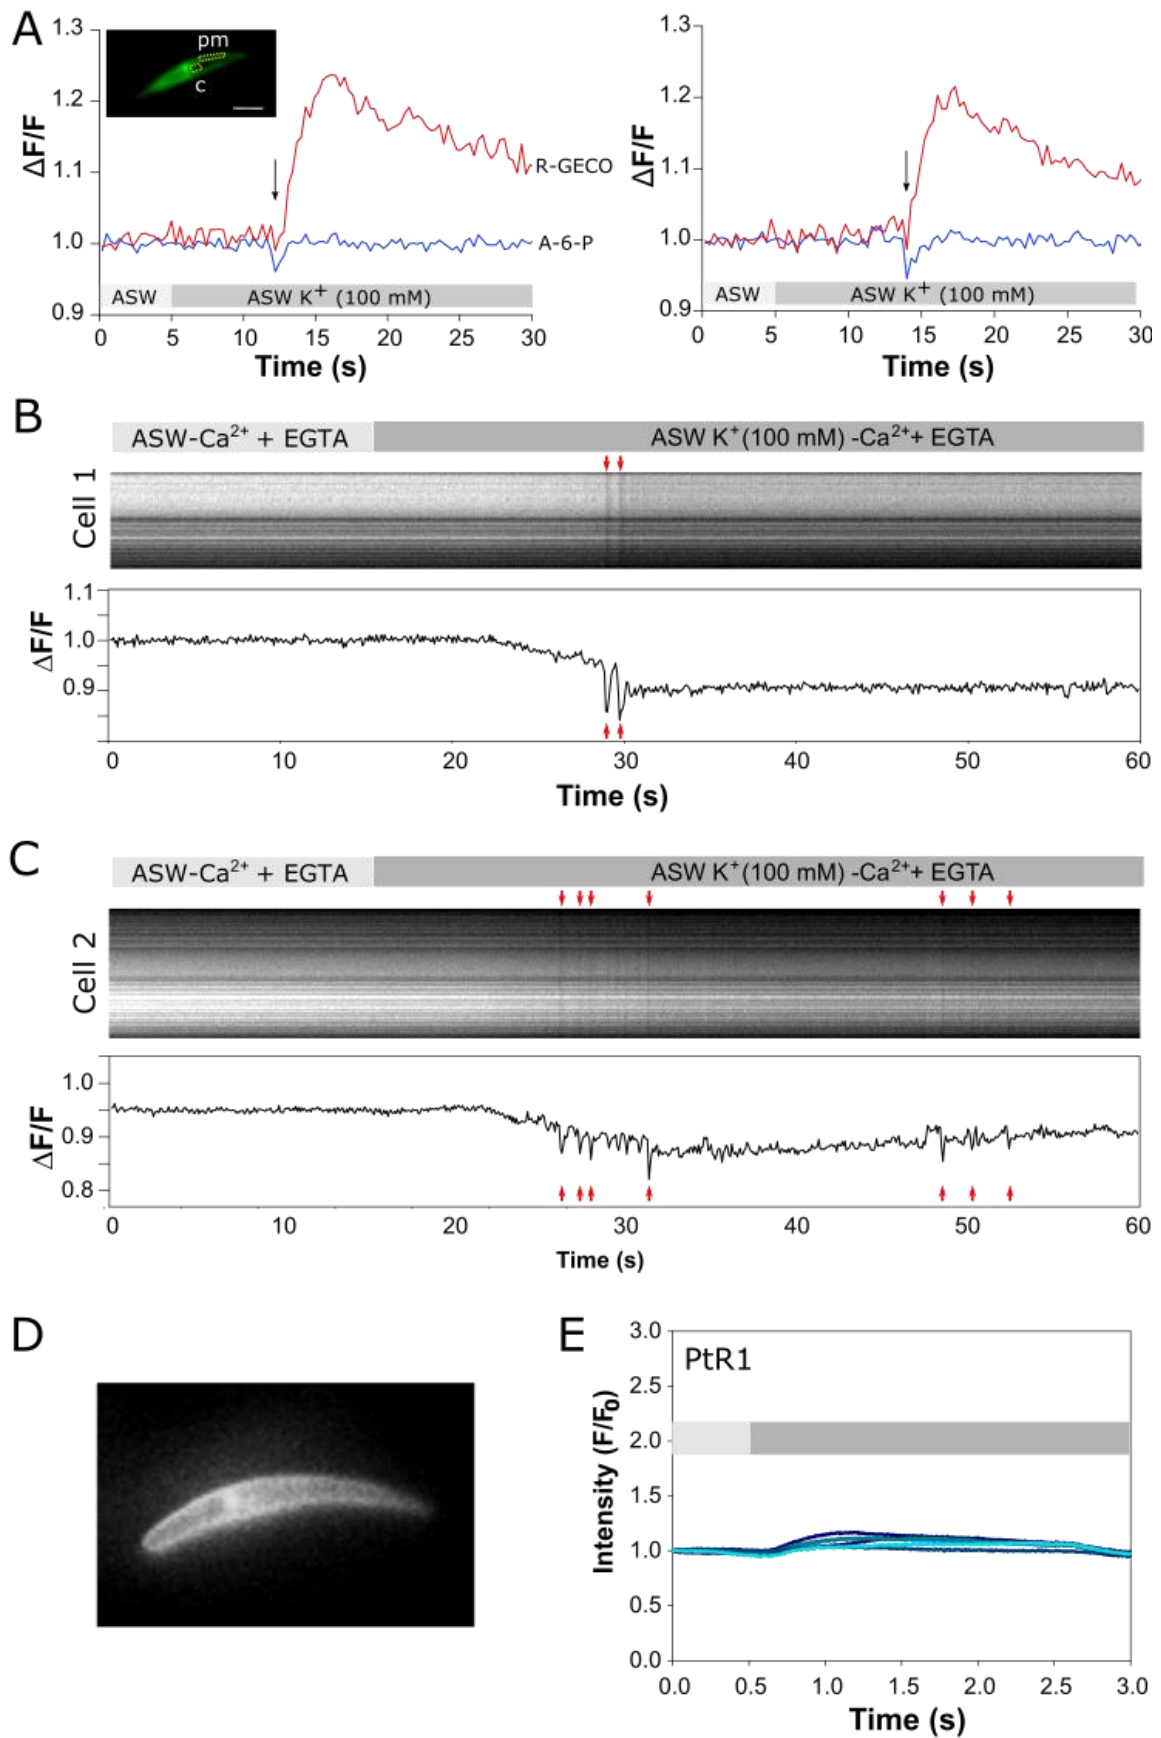

**Figure S3. Rapid depolarisation-activated action potentials are immediately followed by a  $[Ca^{2+}]_{\text{cyt}}$  elevation, but are not dependent on external  $Ca^{2+}$  (related to Figure 3). A.**

Simultaneous determination of membrane potential and cytosolic  $\text{Ca}^{2+}$ . PtR1 cells expressing R-GECO in the cytosol were loaded with the membrane potential dye Annine-6-Plus. Specific regions of interest were used to measure fluorescence in the plasma membrane (pm) and cytosol (c) (inset). Cells were stimulated with 100 mM  $\text{K}^+$  to induce membrane depolarisation. Rapid depolarisation events (arrowed) directly preceded the  $[\text{Ca}^{2+}]_{\text{cyt}}$  elevation. The A-6-P trace was generated by dividing fluorescence in each frame by a rolling median of the ten neighbouring frames to aid visualisation of rapid changes in fluorescence. A threshold decrease in fluorescence of  $>3\%$  ( $>4$  SD of baseline fluorescence) was used to identify depolarisation events. The  $\text{Ca}^{2+}$  trace was generated by dividing normalised R-GECO fluorescence by normalised A-6-P fluorescence to compensate for background A-6-P fluorescence in the cytosolic region. Two representative cells are shown ( $n=4$ ). Bar= 5  $\mu\text{m}$ . **B.** Kymograph from a WT A-6-P stained cell following exposure to ASW + 100 mM  $\text{K}^+$  - $\text{Ca}^{2+}$  + 200  $\mu\text{M}$  EGTA (after 15 s for 45 s) (12.5 frames/s). The kymograph represents changes in fluorescence in the plasma membrane along the length of the cell. Corresponding data for  $\Delta F/F$  over time (s) is plotted below. A further example is shown in (C). In the absence of external  $\text{Ca}^{2+}$  (+200  $\mu\text{M}$  EGTA) multiple transient decreases in fluorescence (arrowed) are observed following the initial depolarisation in response 100 mM  $\text{K}^+$ . **D.** An epifluorescence microscopy image of a WT *Phaeodactylum tricornutum* cell stained with the voltage-sensing dye Annine-6-Plus (A-6-P) used to generate kymograph shown in (C). **E.** Change in fluorescence intensity of R-GECO in 6 representative PtR1 cells exposed to 100 mM  $\text{K}^+$  - $\text{Ca}^{2+}$  + 200  $\mu\text{M}$  EGTA (following pre-perfusion with ASW - $\text{Ca}^{2+}$  +200  $\mu\text{M}$  EGTA) is shown (the experiment was repeated on three independent occasions,  $n$  cells =25, with similar results).

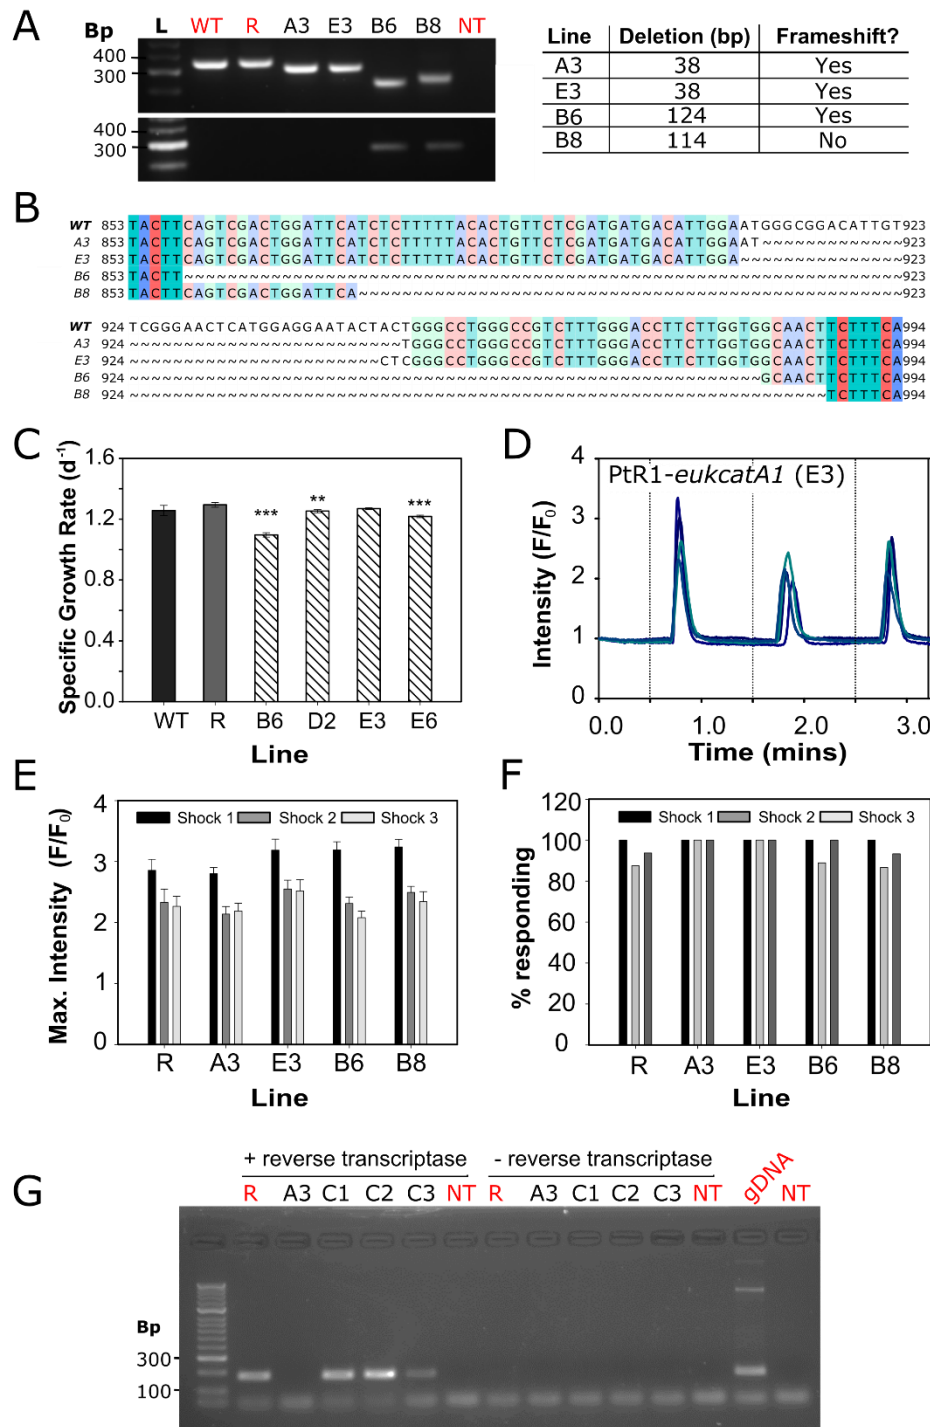

**Figure S4. Biallelic *PtR1-eukcatA1* mutants exhibit a modest reduction in growth rate and are unimpaired in  $\text{Ca}^{2+}$ -signalling responses to hypo-osmotic shock (related to Figure 3 and 4). A.** Bi-allelic *PteukcatA1* mutants were generated using CRISPR-Cas9 with two guide RNAs (sgRNAs) targeted approximately 50 bp apart to span the pore region encoded by the *PtEUKCATA1* gene. PCR amplification of *PtEUKCATA1* from genomic DNA from four independent mutant lines (A3, E3, B6, B8) using primers flanking the two sgRNAs. The

expected product size for WT *PtEUKCATA1* is 350 bp. The smaller products indicate deletions in this region of the genome of mutants (upper panel). Lower gel shows amplification of Cas9 gene: transgene has been lost from mutants A3 and E3. Key: L, ladder; WT, wild type; R, PtR1 (R-GECO) line; NT, no template control. Summary of deletions in independent mutant lines is also shown. **B.** Multiple sequence alignment of *PtEUKCATA1* following sequencing of the PCR products shown in (A). The region of excision varies between lines and extends beyond the original target site of each guide RNA (**methods**). **C.** Specific growth rate of WT fusiform cultures of *P. tricornutum*, PtR1 alongside 4 independent PtR1-*eukcatA1* mutants in liquid f/2 media ( $n=3$ ). **D.** Representative traces of  $Ca^{2+}$  responses for PtR1-*eukcatA1* mutant E3 (intensity of fluorescence) over time exposed to three sequential hypo-osmotic shocks with diluted ASW (90%) as in **Figure S2A**. **E.** Mean maximum intensity of responses to successive shocks for multiple cells over 3 independent replicate experiments per line (error bars, SEM; at least 10 cells were analysed per line, and only those cells that responded are included in analysis) including PtR1 and four independent PtR1-*eukcatA1* mutants (A3, E3, B6, and B8). **F.** Proportion of cells that respond to hypo-osmotic shock (only cells exhibiting  $[Ca^{2+}]_{cyt}$  elevations were used for comparison). **G.** Complemented PtR1-*eukcatA1* mutant A3 lines express the WT *PtEUKCATA1* transcript. Reverse transcriptase PCR on cDNA synthesised from PtR1 (R), mutant line A3 (A3), the three complemented lines (C1-C3), and no template (NT) control. Cultures were sampled four days after inoculation. Primers used were designed to the *PtEUKCATA1* gene and the expected product size was 176 bp (note: the reverse primer targets the deletion site of the *ptEUKCATA1* gene in the A3 mutant, and therefore a product will only be amplified in lines containing the WT gene i.e. R, C1, C2, and C3). The primer sequences were as follows: TTTTGGTGCTTATTCTCTACGTC (forward) and TTCCTCCATGAGTTCCCGAA (reverse).



|                                           | <b>NaChBac [S2]</b>        | <b>PtEUKCATA1</b>                          | <b>OsEUKCATA1</b>                          |
|-------------------------------------------|----------------------------|--------------------------------------------|--------------------------------------------|
|                                           | <i>Bacillus halodurans</i> | <i>Phaeodactylum tricornutum</i>           | <i>Odontella sinensis</i>                  |
| SF                                        | TLESWA                     | TLE-WAD                                    | TLDAWAD                                    |
| Voltage of half activation (mV)           | -48.1±1.5<br>(n=10)        | -18.7±0.4<br>(n=14)                        | -23.8±0.2<br>(n=12)                        |
| Voltage of half steady-state inactivation | -52.7±0.3<br>(n=20)        | -56.5±1.6<br>(n=17)                        | -45.1±0.2<br>(n=12)                        |
| $\tau$ activation (ms)                    | 12.9 ± 0.4                 | 9.2±1.9<br>(measured at -10 mv)<br>(n=26)  | 1.6±0.1<br>(measured at -10 mv)<br>(n=13)  |
| $\tau$ inactivation (ms)                  | 166 ± 13                   | 33.0±5.8<br>measured (at -10 mv)<br>(n=26) | 52.6±2.9<br>(measured at -10 mv)<br>(n=13) |
| $\tau$ of recovery of inactivation (ms)   | 650±33.5<br>(n=3)          | 650±33.5<br>(n=3)                          | 183±6.9<br>(n=15)                          |

**Table S1. Summary of kinetic properties and pharmacology of PtEUKCATA1 and OsEUKCATA1 (related to Figure 2 and Figure S1). Number of cells (*n*) examined is indicated.**

|                         | <b>E1</b> | <b>P</b> | <b>E2</b> | <b>E3</b> | <b>E4</b> |
|-------------------------|-----------|----------|-----------|-----------|-----------|
| <b>NaCl</b>             | 140       | 10       | 140       | -         | -         |
| <b>KCl</b>              | 4         | -        | 4         | 4         | 4         |
| <b>MgCl<sub>2</sub></b> | 1         | 1        | 1         | 1         | 1         |
| <b>CaCl<sub>2</sub></b> | 5         | 1        | -         | 30        | -         |
| <b>CsCl</b>             | -         | -        | 5         | 5         | 5         |
| <b>CsF</b>              | -         | 130      | -         | -         | -         |
| <b>BaCl<sub>2</sub></b> | -         | -        | -         | -         | 30        |
| <b>HEPES</b>            | 10        | 10       | 10        | 10        | 10        |
| <b>NMDG</b>             | -         | -        | -         | 140       | 140       |
| <b>TEA-Cl</b>           | -         | 5        | -         | -         | -         |
| <b>EGTA</b>             | -         | 10       | -         | -         | -         |
| <b>Glucose</b>          | 5         | -        | -         | -         | -         |
| <b>D-Sorbitol</b>       | 5         | -        | -         | -         | -         |
| <b>pH</b>               | 7.4       | 7.2      | 7.4       | 7.4       | 7.4       |
|                         | NaOH      | CsOH     | CsOH      | CsOH      | CsOH      |

**Table S2. Composition of electrophysiology solutions (mM) (related to Figure 2).** NMDG, N-methyl-D-glutamine; E: Extracellular solution; P: pipette solution; E1: standard extracellular solution; E2: 0 CaCl<sub>2</sub> (-Ca<sup>2+</sup>); E3: 0 NaCl<sub>2</sub> with 30 mM CaCl<sub>2</sub> (-Na<sup>+</sup>); E4: 0 NaCl<sub>2</sub> with 30 mM BaCl<sub>2</sub> (+Ba<sup>2+</sup>). For OsEUKCATA1: 10 mM glucose was included, but not MgCl<sub>2</sub> and KCl, and the concentration of NMDG in E3 and E4 was 95 mM.

## Supplemental References

- [S1] Taylor, A.R. (2009). A Fast Na<sup>+</sup>/Ca<sup>2+</sup>-based action potential in a marine diatom. *PLoS One* 4, e4966.
- [S2] Ren, D., Navarro, B., Xu, H., Yue, L., Shi, Q., and Clapham, D.E. (2001). A prokaryotic voltage-gated sodium channel. *Science* 294, 2372–5.
- [S3] Verret, F., Wheeler, G., Taylor, A.R., Farnham, G., and Brownlee, C. (2010). Calcium channels in photosynthetic eukaryotes: implications for evolution of calcium-based signalling. *New Phytol.* 187, 23–43.
- [S4] Cai, X., Wang, X., and Clapham, D.E. (2014). Early evolution of the eukaryotic Ca<sup>2+</sup> signaling machinery: conservation of the CatSper channel complex. *Mol. Biol. Evol.* 31, 2735–2740.
